# Supplementary material for: Temporally resolved transcriptional recording in E. coli DNA using a Retro-Cascorder
Source: Springer Nature journal article supplement (doi:10.1038/s41596-023-00819-6), 2023-04-14
Supplement: MOESM3 [file 41596_2023_819_MOESM3_ESM14.xlsx]

## Sheet: Sheet1
i7/i5 barcodes by well				Oligos by well (2 per well)
	i7 Barcode	i5 Barcode		Well Position	Sequence Name	Sequence
A1	AGAATCCT	ACACACAC		A1	i7_SLS_indices_plate3_0	CAAGCAGAAGACGGCATACGAGATAGGATTCTGTGACTGGAGTTCAGACGTGTGCTCTTCCGATCT
A2	ATGACTGC	CGACTATT		A1	i5_SLS_indices_plate3_0	AATGATACGGCGACCACCGAGATCTACACACACACACACACTCTTTCCCTACACGACGCTCTTCCGATCT
A3	AGCGCATA	GATCTCTC		A2	i7_SLS_indices_plate3_1	CAAGCAGAAGACGGCATACGAGATGCAGTCATGTGACTGGAGTTCAGACGTGTGCTCTTCCGATCT
A4	GGAGTACT	TCTGTACG		A2	i5_SLS_indices_plate3_1	AATGATACGGCGACCACCGAGATCTACACCGACTATTACACTCTTTCCCTACACGACGCTCTTCCGATCT
A5	AGGCTCGT	GTGTCCGT		A3	i7_SLS_indices_plate3_2	CAAGCAGAAGACGGCATACGAGATTATGCGCTGTGACTGGAGTTCAGACGTGTGCTCTTCCGATCT
A6	ACGAGCAT	ACTTCCGT		A3	i5_SLS_indices_plate3_2	AATGATACGGCGACCACCGAGATCTACACGATCTCTCACACTCTTTCCCTACACGACGCTCTTCCGATCT
A7	AGTACTCC	GTTAGTTG		A4	i7_SLS_indices_plate3_3	CAAGCAGAAGACGGCATACGAGATAGTACTCCGTGACTGGAGTTCAGACGTGTGCTCTTCCGATCT
A8	GAAGTGCA	GTGTATAG		A4	i5_SLS_indices_plate3_3	AATGATACGGCGACCACCGAGATCTACACTCTGTACGACACTCTTTCCCTACACGACGCTCTTCCGATCT
A9	GAGCACCA	GCTTATGG		A5	i7_SLS_indices_plate3_4	CAAGCAGAAGACGGCATACGAGATACGAGCCTGTGACTGGAGTTCAGACGTGTGCTCTTCCGATCT
A10	ACCAAGCG	ATCTCGTT		A5	i5_SLS_indices_plate3_4	AATGATACGGCGACCACCGAGATCTACACGTGTCCGTACACTCTTTCCCTACACGACGCTCTTCCGATCT
A11	GGCTCTCT	CATGTGAC		A6	i7_SLS_indices_plate3_5	CAAGCAGAAGACGGCATACGAGATATGCTCGTGTGACTGGAGTTCAGACGTGTGCTCTTCCGATCT
A12	CCAAGACA	TCTCACGG		A6	i5_SLS_indices_plate3_5	AATGATACGGCGACCACCGAGATCTACACACTTCCGTACACTCTTTCCCTACACGACGCTCTTCCGATCT
B1	TCATTGTG	CAACCGAA		A7	i7_SLS_indices_plate3_6	CAAGCAGAAGACGGCATACGAGATGGAGTACTGTGACTGGAGTTCAGACGTGTGCTCTTCCGATCT
B2	ACTCCTGC	ATGTAGTC		A7	i5_SLS_indices_plate3_6	AATGATACGGCGACCACCGAGATCTACACGTTAGTTGACACTCTTTCCCTACACGACGCTCTTCCGATCT
B3	GTATACAG	GGTGGTAG		A8	i7_SLS_indices_plate3_7	CAAGCAGAAGACGGCATACGAGATTGCACTTCGTGACTGGAGTTCAGACGTGTGCTCTTCCGATCT
B4	CTATACGA	ATCTAAGC		A8	i5_SLS_indices_plate3_7	AATGATACGGCGACCACCGAGATCTACACGTGTATAGACACTCTTTCCCTACACGACGCTCTTCCGATCT
B5	CTCCATCG	GGCTATGA		A9	i7_SLS_indices_plate3_8	CAAGCAGAAGACGGCATACGAGATTGGTGCTCGTGACTGGAGTTCAGACGTGTGCTCTTCCGATCT
B6	CGAACAAT	ACTAGCGT		A9	i5_SLS_indices_plate3_8	AATGATACGGCGACCACCGAGATCTACACGCTTATGGACACTCTTTCCCTACACGACGCTCTTCCGATCT
B7	GCAATGTT	ATTCGTCT		A10	i7_SLS_indices_plate3_9	CAAGCAGAAGACGGCATACGAGATCGCTTGGTGTGACTGGAGTTCAGACGTGTGCTCTTCCGATCT
B8	CTACGTTA	GGCGTATT		A10	i5_SLS_indices_plate3_9	AATGATACGGCGACCACCGAGATCTACACATCTCGTTACACTCTTTCCCTACACGACGCTCTTCCGATCT
B9	AATCTTCC	CAATTCGG		A11	i7_SLS_indices_plate3_10	CAAGCAGAAGACGGCATACGAGATAGAGAGCCGTGACTGGAGTTCAGACGTGTGCTCTTCCGATCT
B10	TCACGTTC	ACCTCTTA		A11	i5_SLS_indices_plate3_10	AATGATACGGCGACCACCGAGATCTACACCATGTGACACACTCTTTCCCTACACGACGCTCTTCCGATCT
B11	ATTGCCGC	GACAGGTA		A12	i7_SLS_indices_plate3_11	CAAGCAGAAGACGGCATACGAGATTGTCTTGGGTGACTGGAGTTCAGACGTGTGCTCTTCCGATCT
B12	TTGTACGA	TTGCGTTG		A12	i5_SLS_indices_plate3_11	AATGATACGGCGACCACCGAGATCTACACTCTCACGGACACTCTTTCCCTACACGACGCTCTTCCGATCT
C1	AACTGCGG	GACACAGA		B1	i7_SLS_indices_plate3_12	CAAGCAGAAGACGGCATACGAGATCACAATGAGTGACTGGAGTTCAGACGTGTGCTCTTCCGATCT
C2	CTCGTAGT	AATTGCCG		B1	i5_SLS_indices_plate3_12	AATGATACGGCGACCACCGAGATCTACACCAACCGAAACACTCTTTCCCTACACGACGCTCTTCCGATCT
C3	GATTCCGG	AATCCGAA		B2	i7_SLS_indices_plate3_13	CAAGCAGAAGACGGCATACGAGATGCAGGAGTGTGACTGGAGTTCAGACGTGTGCTCTTCCGATCT
C4	AGGTCTAG	ATTGCAGC		B2	i5_SLS_indices_plate3_13	AATGATACGGCGACCACCGAGATCTACACATGTAGTCACACTCTTTCCCTACACGACGCTCTTCCGATCT
C5	AGTGCTTG	ATGATCGT		B3	i7_SLS_indices_plate3_14	CAAGCAGAAGACGGCATACGAGATCTGTATACGTGACTGGAGTTCAGACGTGTGCTCTTCCGATCT
C6	GTCTCTGT	TCTCTCGC		B3	i5_SLS_indices_plate3_14	AATGATACGGCGACCACCGAGATCTACACGGTGGTAGACACTCTTTCCCTACACGACGCTCTTCCGATCT
C7	GAACGAGA	ACGGTAGC		B4	i7_SLS_indices_plate3_15	CAAGCAGAAGACGGCATACGAGATTCGTATAGGTGACTGGAGTTCAGACGTGTGCTCTTCCGATCT
C8	TGCCTGGT	CAATTCGA		B4	i5_SLS_indices_plate3_15	AATGATACGGCGACCACCGAGATCTACACATCTAAGCACACTCTTTCCCTACACGACGCTCTTCCGATCT
C9	CGCGTAAT	GCACTGTT		B5	i7_SLS_indices_plate3_16	CAAGCAGAAGACGGCATACGAGATCGATGGAGGTGACTGGAGTTCAGACGTGTGCTCTTCCGATCT
C10	AAGACACT	CTCGAATA		B5	i5_SLS_indices_plate3_16	AATGATACGGCGACCACCGAGATCTACACGGCTATGAACACTCTTTCCCTACACGACGCTCTTCCGATCT
C11	TATTAGCC	ATGTGCGC		B6	i7_SLS_indices_plate3_17	CAAGCAGAAGACGGCATACGAGATATTGTTCGGTGACTGGAGTTCAGACGTGTGCTCTTCCGATCT
C12	ATGTTGCC	TGAGCTCG		B6	i5_SLS_indices_plate3_17	AATGATACGGCGACCACCGAGATCTACACACTAGCGTACACTCTTTCCCTACACGACGCTCTTCCGATCT
D1	CTTCAGGA	CTGCGCTT		B7	i7_SLS_indices_plate3_18	CAAGCAGAAGACGGCATACGAGATAACATTGCGTGACTGGAGTTCAGACGTGTGCTCTTCCGATCT
D2	TGTGACGC	AGCGAGTG		B7	i5_SLS_indices_plate3_18	AATGATACGGCGACCACCGAGATCTACACATTCGTCTACACTCTTTCCCTACACGACGCTCTTCCGATCT
D3	AGAACTAG	GTTATCCG		B8	i7_SLS_indices_plate3_19	CAAGCAGAAGACGGCATACGAGATTAACGTAGGTGACTGGAGTTCAGACGTGTGCTCTTCCGATCT
D4	AATGCGTC	TCACTCGA		B8	i5_SLS_indices_plate3_19	AATGATACGGCGACCACCGAGATCTACACGGCGTATTACACTCTTTCCCTACACGACGCTCTTCCGATCT
D5	ACGAGGAT	AGTTCTCG		B9	i7_SLS_indices_plate3_20	CAAGCAGAAGACGGCATACGAGATGGAAGATTGTGACTGGAGTTCAGACGTGTGCTCTTCCGATCT
D6	CGAGCTAC	TCCACTAG		B9	i5_SLS_indices_plate3_20	AATGATACGGCGACCACCGAGATCTACACCAATTCGGACACTCTTTCCCTACACGACGCTCTTCCGATCT
D7	GCAATAGG	GCATGGTC		B10	i7_SLS_indices_plate3_21	CAAGCAGAAGACGGCATACGAGATGAACGTGAGTGACTGGAGTTCAGACGTGTGCTCTTCCGATCT
D8	TACCGACA	CTAGATAG		B10	i5_SLS_indices_plate3_21	AATGATACGGCGACCACCGAGATCTACACACCTCTTAACACTCTTTCCCTACACGACGCTCTTCCGATCT
D9	CCGATAAC	AGCTGTGA		B11	i7_SLS_indices_plate3_22	CAAGCAGAAGACGGCATACGAGATGCGGCAATGTGACTGGAGTTCAGACGTGTGCTCTTCCGATCT
D10	TCGAGGTA	GCACTACT		B11	i5_SLS_indices_plate3_22	AATGATACGGCGACCACCGAGATCTACACGACAGGTAACACTCTTTCCCTACACGACGCTCTTCCGATCT
D11	GAGGTCGT	GCACGACT		B12	i7_SLS_indices_plate3_23	CAAGCAGAAGACGGCATACGAGATTCGTACAAGTGACTGGAGTTCAGACGTGTGCTCTTCCGATCT
D12	GTTACATC	CTCATTCG		B12	i5_SLS_indices_plate3_23	AATGATACGGCGACCACCGAGATCTACACTTGCGTTGACACTCTTTCCCTACACGACGCTCTTCCGATCT
E1	AACTCCGG	TCGTTAGA		C1	i7_SLS_indices_plate3_24	CAAGCAGAAGACGGCATACGAGATCCGCAGTTGTGACTGGAGTTCAGACGTGTGCTCTTCCGATCT
E2	GCCATACG	GATACTGA		C1	i5_SLS_indices_plate3_24	AATGATACGGCGACCACCGAGATCTACACGACACAGAACACTCTTTCCCTACACGACGCTCTTCCGATCT
E3	CTGTACGA	CTGCTTCA		C2	i7_SLS_indices_plate3_25	CAAGCAGAAGACGGCATACGAGATACTACGAGGTGACTGGAGTTCAGACGTGTGCTCTTCCGATCT
E4	GTCATACC	ATGGATTC		C2	i5_SLS_indices_plate3_25	AATGATACGGCGACCACCGAGATCTACACAATTGCCGACACTCTTTCCCTACACGACGCTCTTCCGATCT
E5	TAGAGTGA	GCCTCTGT		C3	i7_SLS_indices_plate3_26	CAAGCAGAAGACGGCATACGAGATCCGGAATCGTGACTGGAGTTCAGACGTGTGCTCTTCCGATCT
E6	GCTGATCG	ATAGAACG		C3	i5_SLS_indices_plate3_26	AATGATACGGCGACCACCGAGATCTACACAATCCGAAACACTCTTTCCCTACACGACGCTCTTCCGATCT
E7	TTGTTCGG	GACAATAC		C4	i7_SLS_indices_plate3_27	CAAGCAGAAGACGGCATACGAGATCTAGACCTGTGACTGGAGTTCAGACGTGTGCTCTTCCGATCT
E8	GAATAGGA	AGTCACCT		C4	i5_SLS_indices_plate3_27	AATGATACGGCGACCACCGAGATCTACACATTGCAGCACACTCTTTCCCTACACGACGCTCTTCCGATCT
E9	GGATAGGT	GAGGTGGA		C5	i7_SLS_indices_plate3_28	CAAGCAGAAGACGGCATACGAGATCAAGCACTGTGACTGGAGTTCAGACGTGTGCTCTTCCGATCT
E10	GTGTCGGA	GATGTTAC		C5	i5_SLS_indices_plate3_28	AATGATACGGCGACCACCGAGATCTACACATGATCGTACACTCTTTCCCTACACGACGCTCTTCCGATCT
E11	GGTTCTAA	CCACTGGA		C6	i7_SLS_indices_plate3_29	CAAGCAGAAGACGGCATACGAGATACAGAGACGTGACTGGAGTTCAGACGTGTGCTCTTCCGATCT
E12	ACGCGGTT	CTTGGTCT		C6	i5_SLS_indices_plate3_29	AATGATACGGCGACCACCGAGATCTACACTCTCTCGCACACTCTTTCCCTACACGACGCTCTTCCGATCT
F1	ATGCGGTG	AGTAGGCT		C7	i7_SLS_indices_plate3_30	CAAGCAGAAGACGGCATACGAGATTCTCGTTCGTGACTGGAGTTCAGACGTGTGCTCTTCCGATCT
F2	CGCATTAT	GATGCTCT		C7	i5_SLS_indices_plate3_30	AATGATACGGCGACCACCGAGATCTACACACGGTAGCACACTCTTTCCCTACACGACGCTCTTCCGATCT
F3	AGTCCAGC	ACACGCGA		C8	i7_SLS_indices_plate3_31	CAAGCAGAAGACGGCATACGAGATACCAGGCAGTGACTGGAGTTCAGACGTGTGCTCTTCCGATCT
F4	ACCTCGTG	GATCTACC		C8	i5_SLS_indices_plate3_31	AATGATACGGCGACCACCGAGATCTACACCAATTCGAACACTCTTTCCCTACACGACGCTCTTCCGATCT
F5	GTGCTACA	GACCTCCA		C9	i7_SLS_indices_plate3_32	CAAGCAGAAGACGGCATACGAGATATTACGCGGTGACTGGAGTTCAGACGTGTGCTCTTCCGATCT
F6	ACCACATG	CTGTCTAA		C9	i5_SLS_indices_plate3_32	AATGATACGGCGACCACCGAGATCTACACGCACTGTTACACTCTTTCCCTACACGACGCTCTTCCGATCT
F7	GATCGCTT	ATTAGCTG		C10	i7_SLS_indices_plate3_33	CAAGCAGAAGACGGCATACGAGATAGTGTCTTGTGACTGGAGTTCAGACGTGTGCTCTTCCGATCT
F8	CACTACAC	TGTCAGTA		C10	i5_SLS_indices_plate3_33	AATGATACGGCGACCACCGAGATCTACACCTCGAATAACACTCTTTCCCTACACGACGCTCTTCCGATCT
F9	CAGACATT	AGAGCGCT		C11	i7_SLS_indices_plate3_34	CAAGCAGAAGACGGCATACGAGATGGCTAATAGTGACTGGAGTTCAGACGTGTGCTCTTCCGATCT
F10	TATTCGTC	CTACACTT		C11	i5_SLS_indices_plate3_34	AATGATACGGCGACCACCGAGATCTACACATGTGCGCACACTCTTTCCCTACACGACGCTCTTCCGATCT
F11	AATACAGG	CGAGTAGC		C12	i7_SLS_indices_plate3_35	CAAGCAGAAGACGGCATACGAGATGGCAACATGTGACTGGAGTTCAGACGTGTGCTCTTCCGATCT
F12	AAGTTCCT	GAGCTTGT		C12	i5_SLS_indices_plate3_35	AATGATACGGCGACCACCGAGATCTACACTGAGCTCGACACTCTTTCCCTACACGACGCTCTTCCGATCT
G1	ACGTGACC	GTCACTAC		D1	i7_SLS_indices_plate3_36	CAAGCAGAAGACGGCATACGAGATTCCTGAAGGTGACTGGAGTTCAGACGTGTGCTCTTCCGATCT
G2	GCTTGTGT	TCGACGTA		D1	i5_SLS_indices_plate3_36	AATGATACGGCGACCACCGAGATCTACACCTGCGCTTACACTCTTTCCCTACACGACGCTCTTCCGATCT
G3	TGAACATG	TACAGTGA		D2	i7_SLS_indices_plate3_37	CAAGCAGAAGACGGCATACGAGATGCGTCACAGTGACTGGAGTTCAGACGTGTGCTCTTCCGATCT
G4	GCTTCTGA	GCCATAGT		D2	i5_SLS_indices_plate3_37	AATGATACGGCGACCACCGAGATCTACACAGCGAGTGACACTCTTTCCCTACACGACGCTCTTCCGATCT
G5	CAGATTCG	TGCCTGTG		D3	i7_SLS_indices_plate3_38	CAAGCAGAAGACGGCATACGAGATCTAGTTCTGTGACTGGAGTTCAGACGTGTGCTCTTCCGATCT
G6	TCACTTGA	TTGCACCA		D3	i5_SLS_indices_plate3_38	AATGATACGGCGACCACCGAGATCTACACGTTATCCGACACTCTTTCCCTACACGACGCTCTTCCGATCT
G7	TACCTCGG	AACGAGGC		D4	i7_SLS_indices_plate3_39	CAAGCAGAAGACGGCATACGAGATGACGCATTGTGACTGGAGTTCAGACGTGTGCTCTTCCGATCT
G8	GCAGATAC	CTAAGGCG		D4	i5_SLS_indices_plate3_39	AATGATACGGCGACCACCGAGATCTACACTCACTCGAACACTCTTTCCCTACACGACGCTCTTCCGATCT
G9	AGAACGCT	GTCTGCTA		D5	i7_SLS_indices_plate3_40	CAAGCAGAAGACGGCATACGAGATATCCTCGTGTGACTGGAGTTCAGACGTGTGCTCTTCCGATCT
G10	CAGAACGC	ACGTAGCA		D5	i5_SLS_indices_plate3_40	AATGATACGGCGACCACCGAGATCTACACAGTTCTCGACACTCTTTCCCTACACGACGCTCTTCCGATCT
G11	GTTGATAG	CCGATTCC		D6	i7_SLS_indices_plate3_41	CAAGCAGAAGACGGCATACGAGATGTAGCTCGGTGACTGGAGTTCAGACGTGTGCTCTTCCGATCT
G12	ATACGACG	AAGAGAAG		D6	i5_SLS_indices_plate3_41	AATGATACGGCGACCACCGAGATCTACACTCCACTAGACACTCTTTCCCTACACGACGCTCTTCCGATCT
H1	TATGGCCA	CAAGCCAC		D7	i7_SLS_indices_plate3_42	CAAGCAGAAGACGGCATACGAGATCCTATTGCGTGACTGGAGTTCAGACGTGTGCTCTTCCGATCT
H2	AGACCTGA	CTTGATGT		D7	i5_SLS_indices_plate3_42	AATGATACGGCGACCACCGAGATCTACACGCATGGTCACACTCTTTCCCTACACGACGCTCTTCCGATCT
H3	ACGAGTCC	CCATGTAT		D8	i7_SLS_indices_plate3_43	CAAGCAGAAGACGGCATACGAGATTGTCGGTAGTGACTGGAGTTCAGACGTGTGCTCTTCCGATCT
H4	TCAGACTT	TCTCTTGG		D8	i5_SLS_indices_plate3_43	AATGATACGGCGACCACCGAGATCTACACCTAGATAGACACTCTTTCCCTACACGACGCTCTTCCGATCT
H5	CACGACTA	ACTCGCGT		D9	i7_SLS_indices_plate3_44	CAAGCAGAAGACGGCATACGAGATGTTATCGGGTGACTGGAGTTCAGACGTGTGCTCTTCCGATCT
H6	CAGGCGTA	GCGAGATT		D9	i5_SLS_indices_plate3_44	AATGATACGGCGACCACCGAGATCTACACAGCTGTGAACACTCTTTCCCTACACGACGCTCTTCCGATCT
H7	ACATGAGT	TCGTAAGA		D10	i7_SLS_indices_plate3_45	CAAGCAGAAGACGGCATACGAGATTACCTCGAGTGACTGGAGTTCAGACGTGTGCTCTTCCGATCT
H8	TCACATAG	GTTCGTGT		D10	i5_SLS_indices_plate3_45	AATGATACGGCGACCACCGAGATCTACACGCACTACTACACTCTTTCCCTACACGACGCTCTTCCGATCT
H9	AGCAGTAG	GGAACCGA		D11	i7_SLS_indices_plate3_46	CAAGCAGAAGACGGCATACGAGATACGACCTCGTGACTGGAGTTCAGACGTGTGCTCTTCCGATCT
H10	TCGGTCTA	CCATTGTC		D11	i5_SLS_indices_plate3_46	AATGATACGGCGACCACCGAGATCTACACGCACGACTACACTCTTTCCCTACACGACGCTCTTCCGATCT
H11	TGTGCTCT	ATACGTCA		D12	i7_SLS_indices_plate3_47	CAAGCAGAAGACGGCATACGAGATGATGTAACGTGACTGGAGTTCAGACGTGTGCTCTTCCGATCT
H12	TGGCTGTA	GGAACATT		D12	i5_SLS_indices_plate3_47	AATGATACGGCGACCACCGAGATCTACACCTCATTCGACACTCTTTCCCTACACGACGCTCTTCCGATCT
				E1	i7_SLS_indices_plate3_48	CAAGCAGAAGACGGCATACGAGATCCGGAGTTGTGACTGGAGTTCAGACGTGTGCTCTTCCGATCT
				E1	i5_SLS_indices_plate3_48	AATGATACGGCGACCACCGAGATCTACACTCGTTAGAACACTCTTTCCCTACACGACGCTCTTCCGATCT
				E2	i7_SLS_indices_plate3_49	CAAGCAGAAGACGGCATACGAGATCGTATGGCGTGACTGGAGTTCAGACGTGTGCTCTTCCGATCT
				E2	i5_SLS_indices_plate3_49	AATGATACGGCGACCACCGAGATCTACACGATACTGAACACTCTTTCCCTACACGACGCTCTTCCGATCT
				E3	i7_SLS_indices_plate3_50	CAAGCAGAAGACGGCATACGAGATTCGTACAGGTGACTGGAGTTCAGACGTGTGCTCTTCCGATCT
				E3	i5_SLS_indices_plate3_50	AATGATACGGCGACCACCGAGATCTACACCTGCTTCAACACTCTTTCCCTACACGACGCTCTTCCGATCT
				E4	i7_SLS_indices_plate3_51	CAAGCAGAAGACGGCATACGAGATGGTATGACGTGACTGGAGTTCAGACGTGTGCTCTTCCGATCT
				E4	i5_SLS_indices_plate3_51	AATGATACGGCGACCACCGAGATCTACACATGGATTCACACTCTTTCCCTACACGACGCTCTTCCGATCT
				E5	i7_SLS_indices_plate3_52	CAAGCAGAAGACGGCATACGAGATTCACTCTAGTGACTGGAGTTCAGACGTGTGCTCTTCCGATCT
				E5	i5_SLS_indices_plate3_52	AATGATACGGCGACCACCGAGATCTACACGCCTCTGTACACTCTTTCCCTACACGACGCTCTTCCGATCT
				E6	i7_SLS_indices_plate3_53	CAAGCAGAAGACGGCATACGAGATCGATCAGCGTGACTGGAGTTCAGACGTGTGCTCTTCCGATCT
				E6	i5_SLS_indices_plate3_53	AATGATACGGCGACCACCGAGATCTACACATAGAACGACACTCTTTCCCTACACGACGCTCTTCCGATCT
				E7	i7_SLS_indices_plate3_54	CAAGCAGAAGACGGCATACGAGATCCGAACAAGTGACTGGAGTTCAGACGTGTGCTCTTCCGATCT
				E7	i5_SLS_indices_plate3_54	AATGATACGGCGACCACCGAGATCTACACGACAATACACACTCTTTCCCTACACGACGCTCTTCCGATCT
				E8	i7_SLS_indices_plate3_55	CAAGCAGAAGACGGCATACGAGATTCCTATTCGTGACTGGAGTTCAGACGTGTGCTCTTCCGATCT
				E8	i5_SLS_indices_plate3_55	AATGATACGGCGACCACCGAGATCTACACAGTCACCTACACTCTTTCCCTACACGACGCTCTTCCGATCT
				E9	i7_SLS_indices_plate3_56	CAAGCAGAAGACGGCATACGAGATACCTATCCGTGACTGGAGTTCAGACGTGTGCTCTTCCGATCT
				E9	i5_SLS_indices_plate3_56	AATGATACGGCGACCACCGAGATCTACACGAGGTGGAACACTCTTTCCCTACACGACGCTCTTCCGATCT
				E10	i7_SLS_indices_plate3_57	CAAGCAGAAGACGGCATACGAGATTCCGACACGTGACTGGAGTTCAGACGTGTGCTCTTCCGATCT
				E10	i5_SLS_indices_plate3_57	AATGATACGGCGACCACCGAGATCTACACGATGTTACACACTCTTTCCCTACACGACGCTCTTCCGATCT
				E11	i7_SLS_indices_plate3_58	CAAGCAGAAGACGGCATACGAGATTTAGAACCGTGACTGGAGTTCAGACGTGTGCTCTTCCGATCT
				E11	i5_SLS_indices_plate3_58	AATGATACGGCGACCACCGAGATCTACACCCACTGGAACACTCTTTCCCTACACGACGCTCTTCCGATCT
				E12	i7_SLS_indices_plate3_59	CAAGCAGAAGACGGCATACGAGATAACCGCGTGTGACTGGAGTTCAGACGTGTGCTCTTCCGATCT
				E12	i5_SLS_indices_plate3_59	AATGATACGGCGACCACCGAGATCTACACCTTGGTCTACACTCTTTCCCTACACGACGCTCTTCCGATCT
				F1	i7_SLS_indices_plate3_60	CAAGCAGAAGACGGCATACGAGATCACCGCATGTGACTGGAGTTCAGACGTGTGCTCTTCCGATCT
				F1	i5_SLS_indices_plate3_60	AATGATACGGCGACCACCGAGATCTACACAGTAGGCTACACTCTTTCCCTACACGACGCTCTTCCGATCT
				F2	i7_SLS_indices_plate3_61	CAAGCAGAAGACGGCATACGAGATATAATGCGGTGACTGGAGTTCAGACGTGTGCTCTTCCGATCT
				F2	i5_SLS_indices_plate3_61	AATGATACGGCGACCACCGAGATCTACACGATGCTCTACACTCTTTCCCTACACGACGCTCTTCCGATCT
				F3	i7_SLS_indices_plate3_62	CAAGCAGAAGACGGCATACGAGATGCTGGACTGTGACTGGAGTTCAGACGTGTGCTCTTCCGATCT
				F3	i5_SLS_indices_plate3_62	AATGATACGGCGACCACCGAGATCTACACACACGCGAACACTCTTTCCCTACACGACGCTCTTCCGATCT
				F4	i7_SLS_indices_plate3_63	CAAGCAGAAGACGGCATACGAGATCACGAGGTGTGACTGGAGTTCAGACGTGTGCTCTTCCGATCT
				F4	i5_SLS_indices_plate3_63	AATGATACGGCGACCACCGAGATCTACACGATCTACCACACTCTTTCCCTACACGACGCTCTTCCGATCT
				F5	i7_SLS_indices_plate3_64	CAAGCAGAAGACGGCATACGAGATTGTAGCACGTGACTGGAGTTCAGACGTGTGCTCTTCCGATCT
				F5	i5_SLS_indices_plate3_64	AATGATACGGCGACCACCGAGATCTACACGACCTCCAACACTCTTTCCCTACACGACGCTCTTCCGATCT
				F6	i7_SLS_indices_plate3_65	CAAGCAGAAGACGGCATACGAGATCATGTGGTGTGACTGGAGTTCAGACGTGTGCTCTTCCGATCT
				F6	i5_SLS_indices_plate3_65	AATGATACGGCGACCACCGAGATCTACACCTGTCTAAACACTCTTTCCCTACACGACGCTCTTCCGATCT
				F7	i7_SLS_indices_plate3_66	CAAGCAGAAGACGGCATACGAGATAAGCGATCGTGACTGGAGTTCAGACGTGTGCTCTTCCGATCT
				F7	i5_SLS_indices_plate3_66	AATGATACGGCGACCACCGAGATCTACACATTAGCTGACACTCTTTCCCTACACGACGCTCTTCCGATCT
				F8	i7_SLS_indices_plate3_67	CAAGCAGAAGACGGCATACGAGATGTGTAGTGGTGACTGGAGTTCAGACGTGTGCTCTTCCGATCT
				F8	i5_SLS_indices_plate3_67	AATGATACGGCGACCACCGAGATCTACACTGTCAGTAACACTCTTTCCCTACACGACGCTCTTCCGATCT
				F9	i7_SLS_indices_plate3_68	CAAGCAGAAGACGGCATACGAGATAATGTCTGGTGACTGGAGTTCAGACGTGTGCTCTTCCGATCT
				F9	i5_SLS_indices_plate3_68	AATGATACGGCGACCACCGAGATCTACACAGAGCGCTACACTCTTTCCCTACACGACGCTCTTCCGATCT
				F10	i7_SLS_indices_plate3_69	CAAGCAGAAGACGGCATACGAGATGACGAATAGTGACTGGAGTTCAGACGTGTGCTCTTCCGATCT
				F10	i5_SLS_indices_plate3_69	AATGATACGGCGACCACCGAGATCTACACCTACACTTACACTCTTTCCCTACACGACGCTCTTCCGATCT
				F11	i7_SLS_indices_plate3_70	CAAGCAGAAGACGGCATACGAGATCCTGTATTGTGACTGGAGTTCAGACGTGTGCTCTTCCGATCT
				F11	i5_SLS_indices_plate3_70	AATGATACGGCGACCACCGAGATCTACACCGAGTAGCACACTCTTTCCCTACACGACGCTCTTCCGATCT
				F12	i7_SLS_indices_plate3_71	CAAGCAGAAGACGGCATACGAGATAGGAACTTGTGACTGGAGTTCAGACGTGTGCTCTTCCGATCT
				F12	i5_SLS_indices_plate3_71	AATGATACGGCGACCACCGAGATCTACACGAGCTTGTACACTCTTTCCCTACACGACGCTCTTCCGATCT
				G1	i7_SLS_indices_plate3_72	CAAGCAGAAGACGGCATACGAGATGGTCACGTGTGACTGGAGTTCAGACGTGTGCTCTTCCGATCT
				G1	i5_SLS_indices_plate3_72	AATGATACGGCGACCACCGAGATCTACACGTCACTACACACTCTTTCCCTACACGACGCTCTTCCGATCT
				G2	i7_SLS_indices_plate3_73	CAAGCAGAAGACGGCATACGAGATACACAAGCGTGACTGGAGTTCAGACGTGTGCTCTTCCGATCT
				G2	i5_SLS_indices_plate3_73	AATGATACGGCGACCACCGAGATCTACACTCGACGTAACACTCTTTCCCTACACGACGCTCTTCCGATCT
				G3	i7_SLS_indices_plate3_74	CAAGCAGAAGACGGCATACGAGATCATGTTCAGTGACTGGAGTTCAGACGTGTGCTCTTCCGATCT
				G3	i5_SLS_indices_plate3_74	AATGATACGGCGACCACCGAGATCTACACTACAGTGAACACTCTTTCCCTACACGACGCTCTTCCGATCT
				G4	i7_SLS_indices_plate3_75	CAAGCAGAAGACGGCATACGAGATTCAGAAGCGTGACTGGAGTTCAGACGTGTGCTCTTCCGATCT
				G4	i5_SLS_indices_plate3_75	AATGATACGGCGACCACCGAGATCTACACGCCATAGTACACTCTTTCCCTACACGACGCTCTTCCGATCT
				G5	i7_SLS_indices_plate3_76	CAAGCAGAAGACGGCATACGAGATCGAATCTGGTGACTGGAGTTCAGACGTGTGCTCTTCCGATCT
				G5	i5_SLS_indices_plate3_76	AATGATACGGCGACCACCGAGATCTACACTGCCTGTGACACTCTTTCCCTACACGACGCTCTTCCGATCT
				G6	i7_SLS_indices_plate3_77	CAAGCAGAAGACGGCATACGAGATTCAAGTGAGTGACTGGAGTTCAGACGTGTGCTCTTCCGATCT
				G6	i5_SLS_indices_plate3_77	AATGATACGGCGACCACCGAGATCTACACTTGCACCAACACTCTTTCCCTACACGACGCTCTTCCGATCT
				G7	i7_SLS_indices_plate3_78	CAAGCAGAAGACGGCATACGAGATCCGAGGTAGTGACTGGAGTTCAGACGTGTGCTCTTCCGATCT
				G7	i5_SLS_indices_plate3_78	AATGATACGGCGACCACCGAGATCTACACAACGAGGCACACTCTTTCCCTACACGACGCTCTTCCGATCT
				G8	i7_SLS_indices_plate3_79	CAAGCAGAAGACGGCATACGAGATGTATCTGCGTGACTGGAGTTCAGACGTGTGCTCTTCCGATCT
				G8	i5_SLS_indices_plate3_79	AATGATACGGCGACCACCGAGATCTACACCTAAGGCGACACTCTTTCCCTACACGACGCTCTTCCGATCT
				G9	i7_SLS_indices_plate3_80	CAAGCAGAAGACGGCATACGAGATAGCGTTCTGTGACTGGAGTTCAGACGTGTGCTCTTCCGATCT
				G9	i5_SLS_indices_plate3_80	AATGATACGGCGACCACCGAGATCTACACGTCTGCTAACACTCTTTCCCTACACGACGCTCTTCCGATCT
				G10	i7_SLS_indices_plate3_81	CAAGCAGAAGACGGCATACGAGATGCGTTCTGGTGACTGGAGTTCAGACGTGTGCTCTTCCGATCT
				G10	i5_SLS_indices_plate3_81	AATGATACGGCGACCACCGAGATCTACACACGTAGCAACACTCTTTCCCTACACGACGCTCTTCCGATCT
				G11	i7_SLS_indices_plate3_82	CAAGCAGAAGACGGCATACGAGATCTATCAACGTGACTGGAGTTCAGACGTGTGCTCTTCCGATCT
				G11	i5_SLS_indices_plate3_82	AATGATACGGCGACCACCGAGATCTACACCCGATTCCACACTCTTTCCCTACACGACGCTCTTCCGATCT
				G12	i7_SLS_indices_plate3_83	CAAGCAGAAGACGGCATACGAGATCGTCGTATGTGACTGGAGTTCAGACGTGTGCTCTTCCGATCT
				G12	i5_SLS_indices_plate3_83	AATGATACGGCGACCACCGAGATCTACACAAGAGAAGACACTCTTTCCCTACACGACGCTCTTCCGATCT
				H1	i7_SLS_indices_plate3_84	CAAGCAGAAGACGGCATACGAGATTGGCCATAGTGACTGGAGTTCAGACGTGTGCTCTTCCGATCT
				H1	i5_SLS_indices_plate3_84	AATGATACGGCGACCACCGAGATCTACACCAAGCCACACACTCTTTCCCTACACGACGCTCTTCCGATCT
				H2	i7_SLS_indices_plate3_85	CAAGCAGAAGACGGCATACGAGATTCAGGTCTGTGACTGGAGTTCAGACGTGTGCTCTTCCGATCT
				H2	i5_SLS_indices_plate3_85	AATGATACGGCGACCACCGAGATCTACACCTTGATGTACACTCTTTCCCTACACGACGCTCTTCCGATCT
				H3	i7_SLS_indices_plate3_86	CAAGCAGAAGACGGCATACGAGATGGACTCGTGTGACTGGAGTTCAGACGTGTGCTCTTCCGATCT
				H3	i5_SLS_indices_plate3_86	AATGATACGGCGACCACCGAGATCTACACCCATGTATACACTCTTTCCCTACACGACGCTCTTCCGATCT
				H4	i7_SLS_indices_plate3_87	CAAGCAGAAGACGGCATACGAGATAAGTCTGAGTGACTGGAGTTCAGACGTGTGCTCTTCCGATCT
				H4	i5_SLS_indices_plate3_87	AATGATACGGCGACCACCGAGATCTACACTCTCTTGGACACTCTTTCCCTACACGACGCTCTTCCGATCT
				H5	i7_SLS_indices_plate3_88	CAAGCAGAAGACGGCATACGAGATTAGTCGTGGTGACTGGAGTTCAGACGTGTGCTCTTCCGATCT
				H5	i5_SLS_indices_plate3_88	AATGATACGGCGACCACCGAGATCTACACACTCGCGTACACTCTTTCCCTACACGACGCTCTTCCGATCT
				H6	i7_SLS_indices_plate3_89	CAAGCAGAAGACGGCATACGAGATTACGCCTGGTGACTGGAGTTCAGACGTGTGCTCTTCCGATCT
				H6	i5_SLS_indices_plate3_89	AATGATACGGCGACCACCGAGATCTACACGCGAGATTACACTCTTTCCCTACACGACGCTCTTCCGATCT
				H7	i7_SLS_indices_plate3_90	CAAGCAGAAGACGGCATACGAGATACTCATGTGTGACTGGAGTTCAGACGTGTGCTCTTCCGATCT
				H7	i5_SLS_indices_plate3_90	AATGATACGGCGACCACCGAGATCTACACTCGTAAGAACACTCTTTCCCTACACGACGCTCTTCCGATCT
				H8	i7_SLS_indices_plate3_91	CAAGCAGAAGACGGCATACGAGATCTATGTGAGTGACTGGAGTTCAGACGTGTGCTCTTCCGATCT
				H8	i5_SLS_indices_plate3_91	AATGATACGGCGACCACCGAGATCTACACGTTCGTGTACACTCTTTCCCTACACGACGCTCTTCCGATCT
				H9	i7_SLS_indices_plate3_92	CAAGCAGAAGACGGCATACGAGATCTACTGCTGTGACTGGAGTTCAGACGTGTGCTCTTCCGATCT
				H9	i5_SLS_indices_plate3_92	AATGATACGGCGACCACCGAGATCTACACGGAACCGAACACTCTTTCCCTACACGACGCTCTTCCGATCT
				H10	i7_SLS_indices_plate3_93	CAAGCAGAAGACGGCATACGAGATTAGACCGAGTGACTGGAGTTCAGACGTGTGCTCTTCCGATCT
				H10	i5_SLS_indices_plate3_93	AATGATACGGCGACCACCGAGATCTACACCCATTGTCACACTCTTTCCCTACACGACGCTCTTCCGATCT
				H11	i7_SLS_indices_plate3_94	CAAGCAGAAGACGGCATACGAGATAGAGCACAGTGACTGGAGTTCAGACGTGTGCTCTTCCGATCT
				H11	i5_SLS_indices_plate3_94	AATGATACGGCGACCACCGAGATCTACACATACGTCAACACTCTTTCCCTACACGACGCTCTTCCGATCT
				H12	i7_SLS_indices_plate3_95	CAAGCAGAAGACGGCATACGAGATTACAGCCAGTGACTGGAGTTCAGACGTGTGCTCTTCCGATCT
				H12	i5_SLS_indices_plate3_95	AATGATACGGCGACCACCGAGATCTACACGGAACATTACACTCTTTCCCTACACGACGCTCTTCCGATCT
