# Supplementary material for: Temporally resolved transcriptional recording in E. coli DNA using a Retro-Cascorder
Source: Springer Nature journal article supplement (doi:10.1038/s41596-023-00819-6), 2023-04-14
Supplement: MOESM4 [file 41596_2023_819_MOESM4_ESM15.xls]

## Sheet: Readme
	KAPA Library Quantification Kit (Illumina® platforms)
	Data Analysis Template
	v4.14
	This spreadsheet is designed for the analysis of NGS library quantification data generated with the KAPA Library Quantification Kit for Illumina®
	platforms.
	Four sets of worksheets are provided. The first sheet in each set is used for data analysis, whereas the second sheet provides a summary of the
	calculated concentrations for all libraries that were analyzed. This sheet can also be used to calculate the yield of each quantified library
	by entering the library volumes in the designated column.
	Each set of sheets is configured for a different number of libraries and library dilutions:
	- Use the 1 dilution set if only one dilution of each library was assayed. The sheet provides for a maximum of 96 samples.
	- Use the 2 dilutions set if two dilutions of each library were assayed. The sheet provides for a maximum of 48 samples.
	- Use the 3 dilutions set if three dilutions of each library were assayed. The sheet provides for a maximum of 32 samples.
	- Use the 4 dilutions set if four dilutions of each library were assayed. The sheet provides for a maximum of 24 samples
	Unused rows may be deleted once the analysis has been completed.
	Data analysis consists of three parts:
	1. Review Cq values for the six DNA Standards, to evaluate the reliability of the data:
	- Paste the Cq values for each replicate of each DNA Standard into column F of the table in Section 1.
	- If the Cq value for any replicate varies by more than +/- 0.25 of a cycle from the other value(s) (as calculated in column I), that replicate should
	be regarded as an outlier, and moved to column G. If a value is designated an outlier, delete the formula in the corresponding row of column I.
	The difference of 0.25 cycles is arbitrary and instrument-dependent. When deciding on what to classify as an outlier, keep in mind that 1 cycle
	represents a 2-fold difference in concentration.
	- The average Cq value for each DNA Standard should be ~3.3 cycles later than the DNA Standard that is 10-fold more concentrated (between
	3.2 and 3.45 is very good, whereas 3.1 - 3.6 is acceptable). If the spacing between any two standards is less than 3.1 cycles and more than
	3.6 cycles, the corresponding Delta Cq cell in column J will change to red. One or more red Delta Cq cells are an indication of unacceptable
	experimental variation. The assay will most likely not yield reliable library concentrations, and should be repeated. Please refer to the KAPA
	Library Quantification Kit Technical Data Sheet and the KAPA Library Quantification Technical Guide for detailed discussions related to
	experimental factors that can affect the reliability of the assay.
	- The Delta Cq between no template control (NTC) reactions and DNA Standard 6 should preferably be ≥3 cycles.
	2. Generate and review the standard curve and reaction efficiency:
	- In Section 2, the data from Section 1 is used to generate the standard curve and calculate the amplification efficiency for the six DNA
	Standards. Key parameters are calculated using two different methods, and guidelines for interpreting results are provided.
	- The slope and intercept from the graph must be typed into the green cells (D59 and D57, respectively), as these values are used in library
	concentration calculations in Section 3.
	- At least one and a maximum of two DNA Standards may be omitted from the standard curve (if Cq values for those Standards are deemed to
	be unreliable). This can be done by modifying the data range for the graph and formulae in cells D54, D55, D56 and D60. When omitting
	DNA Standards from the curve, remember that the curve may not be extrapolated, and concentrations of libraries with an average Cq value
	outside of the range of the (modified) standard curve may not be calculated.
	3. Calculate library concentrations:
	- In Section 3, the slope and intercept of the standard curve is used to calculate the concentrations of library samples. Please refer to
	Section 5 of the KAPA Library Quantification Kit Technical Data Sheet for complete guidelines.
	- If more than one dilution of a library was assayed, the Delta Cq column may be used to assess whether calculated concentrations are likely to
	be reliable. For example, if the Delta Cq for consecutive 2-fold dilutions falls outside the range of 0.9 - 1.1 cycles, it is an indication that serial
	dilutions were not made with a high degree of accuracy, and that calculated concentrations may be unreliable as a result.
	- If more than one dilution of a library was assayed, the % Deviation column may be used to determine the working concentration of the
	library. If the library concentrations calculated from multiple dilutions falls within 10% from one another, use the average of the concentrations.
	If the calculated concentrations differ by more than 10%, use the average concentration from the dilutions that are deemed (most) reliable.
	In such cases, modify the formula for calculating the working concentration accordingly.
	Calculated library concentrations are exported to the table in the Summary sheet following the Analysis sheet. The amount of each library
	available for the next step in your workflow may be calculated by inserting library volumes in the designated column. This worksheet may be
	extended and customized to calculate other library parameters (e.g. conversion rates, volumes needed for pooling) as per your specific requirements.

## Sheet: 1 dilution - Analysis
		Section 1. Review Cq values for DNA Standards
		- Enter the appropriate information into the fields highlighted in green.
		- Move "outliers" to column G (so these are no longer is used in calculations). Delete the formula in the corresponding row in column I.
		- The average Cq value for each DNA Standard should be ~3.3 cycles later than the DNA Standard that is 10-fold more concentrated (between 3.2 and 3.45 is very good
		and 3.1 - 3.6 is acceptable).
		- If the spacing between any two standards is less than 3.1 cycles and more than 3.6 cycles, those data points (and any library samples falling between those
		data points) are not highly reliable.
		Well	Std #	Conc (pM)	Cq	Outliers	Av Cq	Difference	Delta Cq
			1	20			#DIV/0!	#DIV/0!	-
			1	20				#DIV/0!
			1	20				#DIV/0!	#DIV/0!
			2	2			#DIV/0!	#DIV/0!
			2	2				#DIV/0!
			2	2				#DIV/0!	#DIV/0!
			3	0.2			#DIV/0!	#DIV/0!
			3	0.2				#DIV/0!
			3	0.2				#DIV/0!	#DIV/0!
			4	0.02			#DIV/0!	#DIV/0!
			4	0.02				#DIV/0!
			4	0.02				#DIV/0!	#DIV/0!
			5	0.002			#DIV/0!	#DIV/0!
			5	0.002				#DIV/0!
			5	0.002				#DIV/0!	#DIV/0!
			6	0.0002			#DIV/0!	#DIV/0!
			6	0.0002				#DIV/0!
			6	0.0002				#DIV/0!	#DIV/0!
			NTC	-			#DIV/0!
			NTC	-
			NTC	-
		Section 2. Generate and review the standard curve
		- Type the value for the intercept from the graph to the right into cell D57.
		- Type the value for the slope from the graph to the right into cell D59.								Note: if the standard curve equation does not update, click on the line, right click and select
										Format Trendline. (Untick and) tick the boxes for "Display Equation and R-squared value on chart"
		DNA Standard	Conc in pM	Log conc	Average Cq	Delta Cq
		1	20	1.30103	#DIV/0!	-
		2	2	0.30103	#DIV/0!	#DIV/0!	Should be between 3.1 and 3.6
		3	0.2	-0.69897	#DIV/0!	#DIV/0!
		4	0.02	-1.69897	#DIV/0!	#DIV/0!
		5	0.002	-2.69897	#DIV/0!	#DIV/0!
		6	0.0002	-3.69897	#DIV/0!	#DIV/0!
		Efficiency:	#DIV/0!	(Calculated)	Should be between 90 and 110%
		Slope:	#DIV/0!	(Calculated)	Value must be the same as on the graph
		R-squared:	#DIV/0!	(Calculated)	Should be between 0.99 and 1.00
		Intercept:	11.217	(Type the intercept value from the graph in cell D57)
		If slope =	-3.2394	(Type the slope value from the graph in cell D59)
		then efficiency =	1.03563	(Calculated)	Value must be the same as in cell D54
		Note: it is important to type the appropriate values from the straight line equation into the two green blocks,
		as the table in Section 3 uses these two values to calculate the concentration of the library samples.
		Section 3. Calculate and review library concentrations
		- Sort the data for your library samples by grouping the Cq values for different dilutions of the same sample together. Enter the appropriate information into the fields highlighted in green (Columns C - G).
		- Move the outliers to Column H, so these are no longer is used in calculations. If you move a Cq value (outlier) from column F to H, you have to delete the formula in column J of that row.
		If the average Cq value for a library < than the average Cq value for Std 1, or > than the average Cq value for Std 6, the data from that dilution may not be used in calculations (i.e. you may not extrapolate). If only one dilution of each library was assayed, the library has to
		requantified using a more appropriate dilution.
		Library #	Sample name	Dilution	Cq	Average fragment length (bp)	Outliers/ outside curve	Average Cq	Difference	log (concentration)	Average concentration (pM)	Size-adjusted concentration (pM)	Concentration of undiluted library (pM)	Concentration of undiluted library (nM)	Concentration of undiluted library (ng/µL)
		1						#DIV/0!	#DIV/0!	#DIV/0!	#DIV/0!	#DIV/0!	#DIV/0!	#DIV/0!	#DIV/0!
									#DIV/0!
									#DIV/0!
		2						#DIV/0!	#DIV/0!	#DIV/0!	#DIV/0!	#DIV/0!	#DIV/0!	#DIV/0!	#DIV/0!
									#DIV/0!
									#DIV/0!
		3						#DIV/0!	#DIV/0!	#DIV/0!	#DIV/0!	#DIV/0!	#DIV/0!	#DIV/0!	#DIV/0!
									#DIV/0!
									#DIV/0!
		4						#DIV/0!	#DIV/0!	#DIV/0!	#DIV/0!	#DIV/0!	#DIV/0!	#DIV/0!	#DIV/0!
									#DIV/0!
									#DIV/0!
		5						#DIV/0!	#DIV/0!	#DIV/0!	#DIV/0!	#DIV/0!	#DIV/0!	#DIV/0!	#DIV/0!
									#DIV/0!
									#DIV/0!
		6						#DIV/0!	#DIV/0!	#DIV/0!	#DIV/0!	#DIV/0!	#DIV/0!	#DIV/0!	#DIV/0!
									#DIV/0!
									#DIV/0!
		7						#DIV/0!	#DIV/0!	#DIV/0!	#DIV/0!	#DIV/0!	#DIV/0!	#DIV/0!	#DIV/0!
									#DIV/0!
									#DIV/0!
		8						#DIV/0!	#DIV/0!	#DIV/0!	#DIV/0!	#DIV/0!	#DIV/0!	#DIV/0!	#DIV/0!
									#DIV/0!
									#DIV/0!
		9						#DIV/0!	#DIV/0!	#DIV/0!	#DIV/0!	#DIV/0!	#DIV/0!	#DIV/0!	#DIV/0!
									#DIV/0!
									#DIV/0!
		10						#DIV/0!	#DIV/0!	#DIV/0!	#DIV/0!	#DIV/0!	#DIV/0!	#DIV/0!	#DIV/0!
									#DIV/0!
									#DIV/0!
		11						#DIV/0!	#DIV/0!	#DIV/0!	#DIV/0!	#DIV/0!	#DIV/0!	#DIV/0!	#DIV/0!
									#DIV/0!
									#DIV/0!
		12						#DIV/0!	#DIV/0!	#DIV/0!	#DIV/0!	#DIV/0!	#DIV/0!	#DIV/0!	#DIV/0!
									#DIV/0!
									#DIV/0!
		13						#DIV/0!	#DIV/0!	#DIV/0!	#DIV/0!	#DIV/0!	#DIV/0!	#DIV/0!	#DIV/0!
									#DIV/0!
									#DIV/0!
		14						#DIV/0!	#DIV/0!	#DIV/0!	#DIV/0!	#DIV/0!	#DIV/0!	#DIV/0!	#DIV/0!
									#DIV/0!
									#DIV/0!
		15						#DIV/0!	#DIV/0!	#DIV/0!	#DIV/0!	#DIV/0!	#DIV/0!	#DIV/0!	#DIV/0!
									#DIV/0!
									#DIV/0!
		16						#DIV/0!	#DIV/0!	#DIV/0!	#DIV/0!	#DIV/0!	#DIV/0!	#DIV/0!	#DIV/0!
									#DIV/0!
									#DIV/0!
		17						#DIV/0!	#DIV/0!	#DIV/0!	#DIV/0!	#DIV/0!	#DIV/0!	#DIV/0!	#DIV/0!
									#DIV/0!
									#DIV/0!
		18						#DIV/0!	#DIV/0!	#DIV/0!	#DIV/0!	#DIV/0!	#DIV/0!	#DIV/0!	#DIV/0!
									#DIV/0!
									#DIV/0!
		19						#DIV/0!	#DIV/0!	#DIV/0!	#DIV/0!	#DIV/0!	#DIV/0!	#DIV/0!	#DIV/0!
									#DIV/0!
									#DIV/0!
		20						#DIV/0!	#DIV/0!	#DIV/0!	#DIV/0!	#DIV/0!	#DIV/0!	#DIV/0!	#DIV/0!
									#DIV/0!
									#DIV/0!
		21						#DIV/0!	#DIV/0!	#DIV/0!	#DIV/0!	#DIV/0!	#DIV/0!	#DIV/0!	#DIV/0!
									#DIV/0!
									#DIV/0!
		22						#DIV/0!	#DIV/0!	#DIV/0!	#DIV/0!	#DIV/0!	#DIV/0!	#DIV/0!	#DIV/0!
									#DIV/0!
									#DIV/0!
		23						#DIV/0!	#DIV/0!	#DIV/0!	#DIV/0!	#DIV/0!	#DIV/0!	#DIV/0!	#DIV/0!
									#DIV/0!
									#DIV/0!
		24						#DIV/0!	#DIV/0!	#DIV/0!	#DIV/0!	#DIV/0!	#DIV/0!	#DIV/0!	#DIV/0!
									#DIV/0!
									#DIV/0!
		25						#DIV/0!	#DIV/0!	#DIV/0!	#DIV/0!	#DIV/0!	#DIV/0!	#DIV/0!	#DIV/0!
									#DIV/0!
									#DIV/0!
		26						#DIV/0!	#DIV/0!	#DIV/0!	#DIV/0!	#DIV/0!	#DIV/0!	#DIV/0!	#DIV/0!
									#DIV/0!
									#DIV/0!
		27						#DIV/0!	#DIV/0!	#DIV/0!	#DIV/0!	#DIV/0!	#DIV/0!	#DIV/0!	#DIV/0!
									#DIV/0!
									#DIV/0!
		28						#DIV/0!	#DIV/0!	#DIV/0!	#DIV/0!	#DIV/0!	#DIV/0!	#DIV/0!	#DIV/0!
									#DIV/0!
									#DIV/0!
		29						#DIV/0!	#DIV/0!	#DIV/0!	#DIV/0!	#DIV/0!	#DIV/0!	#DIV/0!	#DIV/0!
									#DIV/0!
									#DIV/0!
		30						#DIV/0!	#DIV/0!	#DIV/0!	#DIV/0!	#DIV/0!	#DIV/0!	#DIV/0!	#DIV/0!
									#DIV/0!
									#DIV/0!
		31						#DIV/0!	#DIV/0!	#DIV/0!	#DIV/0!	#DIV/0!	#DIV/0!	#DIV/0!	#DIV/0!
									#DIV/0!
									#DIV/0!
		32						#DIV/0!	#DIV/0!	#DIV/0!	#DIV/0!	#DIV/0!	#DIV/0!	#DIV/0!	#DIV/0!
									#DIV/0!
									#DIV/0!
		33						#DIV/0!	#DIV/0!	#DIV/0!	#DIV/0!	#DIV/0!	#DIV/0!	#DIV/0!	#DIV/0!
									#DIV/0!
									#DIV/0!
		34						#DIV/0!	#DIV/0!	#DIV/0!	#DIV/0!	#DIV/0!	#DIV/0!	#DIV/0!	#DIV/0!
									#DIV/0!
									#DIV/0!
		35						#DIV/0!	#DIV/0!	#DIV/0!	#DIV/0!	#DIV/0!	#DIV/0!	#DIV/0!	#DIV/0!
									#DIV/0!
									#DIV/0!
		36						#DIV/0!	#DIV/0!	#DIV/0!	#DIV/0!	#DIV/0!	#DIV/0!	#DIV/0!	#DIV/0!
									#DIV/0!
									#DIV/0!
		37						#DIV/0!	#DIV/0!	#DIV/0!	#DIV/0!	#DIV/0!	#DIV/0!	#DIV/0!	#DIV/0!
									#DIV/0!
									#DIV/0!
		38						#DIV/0!	#DIV/0!	#DIV/0!	#DIV/0!	#DIV/0!	#DIV/0!	#DIV/0!	#DIV/0!
									#DIV/0!
									#DIV/0!
		39						#DIV/0!	#DIV/0!	#DIV/0!	#DIV/0!	#DIV/0!	#DIV/0!	#DIV/0!	#DIV/0!
									#DIV/0!
									#DIV/0!
		40						#DIV/0!	#DIV/0!	#DIV/0!	#DIV/0!	#DIV/0!	#DIV/0!	#DIV/0!	#DIV/0!
									#DIV/0!
									#DIV/0!
		41						#DIV/0!	#DIV/0!	#DIV/0!	#DIV/0!	#DIV/0!	#DIV/0!	#DIV/0!	#DIV/0!
									#DIV/0!
									#DIV/0!
		42						#DIV/0!	#DIV/0!	#DIV/0!	#DIV/0!	#DIV/0!	#DIV/0!	#DIV/0!	#DIV/0!
									#DIV/0!
									#DIV/0!
		43						#DIV/0!	#DIV/0!	#DIV/0!	#DIV/0!	#DIV/0!	#DIV/0!	#DIV/0!	#DIV/0!
									#DIV/0!
									#DIV/0!
		44						#DIV/0!	#DIV/0!	#DIV/0!	#DIV/0!	#DIV/0!	#DIV/0!	#DIV/0!	#DIV/0!
									#DIV/0!
									#DIV/0!
		45						#DIV/0!	#DIV/0!	#DIV/0!	#DIV/0!	#DIV/0!	#DIV/0!	#DIV/0!	#DIV/0!
									#DIV/0!
									#DIV/0!
		46						#DIV/0!	#DIV/0!	#DIV/0!	#DIV/0!	#DIV/0!	#DIV/0!	#DIV/0!	#DIV/0!
									#DIV/0!
									#DIV/0!
		47						#DIV/0!	#DIV/0!	#DIV/0!	#DIV/0!	#DIV/0!	#DIV/0!	#DIV/0!	#DIV/0!
									#DIV/0!
									#DIV/0!
		48						#DIV/0!	#DIV/0!	#DIV/0!	#DIV/0!	#DIV/0!	#DIV/0!	#DIV/0!	#DIV/0!
									#DIV/0!
									#DIV/0!
		49						#DIV/0!	#DIV/0!	#DIV/0!	#DIV/0!	#DIV/0!	#DIV/0!	#DIV/0!	#DIV/0!
									#DIV/0!
									#DIV/0!
		50						#DIV/0!	#DIV/0!	#DIV/0!	#DIV/0!	#DIV/0!	#DIV/0!	#DIV/0!	#DIV/0!
									#DIV/0!
									#DIV/0!
		51						#DIV/0!	#DIV/0!	#DIV/0!	#DIV/0!	#DIV/0!	#DIV/0!	#DIV/0!	#DIV/0!
									#DIV/0!
									#DIV/0!
		52						#DIV/0!	#DIV/0!	#DIV/0!	#DIV/0!	#DIV/0!	#DIV/0!	#DIV/0!	#DIV/0!
									#DIV/0!
									#DIV/0!
		53						#DIV/0!	#DIV/0!	#DIV/0!	#DIV/0!	#DIV/0!	#DIV/0!	#DIV/0!	#DIV/0!
									#DIV/0!
									#DIV/0!
		54						#DIV/0!	#DIV/0!	#DIV/0!	#DIV/0!	#DIV/0!	#DIV/0!	#DIV/0!	#DIV/0!
									#DIV/0!
									#DIV/0!
		55						#DIV/0!	#DIV/0!	#DIV/0!	#DIV/0!	#DIV/0!	#DIV/0!	#DIV/0!	#DIV/0!
									#DIV/0!
									#DIV/0!
		56						#DIV/0!	#DIV/0!	#DIV/0!	#DIV/0!	#DIV/0!	#DIV/0!	#DIV/0!	#DIV/0!
									#DIV/0!
									#DIV/0!
		57						#DIV/0!	#DIV/0!	#DIV/0!	#DIV/0!	#DIV/0!	#DIV/0!	#DIV/0!	#DIV/0!
									#DIV/0!
									#DIV/0!
		58						#DIV/0!	#DIV/0!	#DIV/0!	#DIV/0!	#DIV/0!	#DIV/0!	#DIV/0!	#DIV/0!
									#DIV/0!
									#DIV/0!
		59						#DIV/0!	#DIV/0!	#DIV/0!	#DIV/0!	#DIV/0!	#DIV/0!	#DIV/0!	#DIV/0!
									#DIV/0!
									#DIV/0!
		60						#DIV/0!	#DIV/0!	#DIV/0!	#DIV/0!	#DIV/0!	#DIV/0!	#DIV/0!	#DIV/0!
									#DIV/0!
									#DIV/0!
		61						#DIV/0!	#DIV/0!	#DIV/0!	#DIV/0!	#DIV/0!	#DIV/0!	#DIV/0!	#DIV/0!
									#DIV/0!
									#DIV/0!
		62						#DIV/0!	#DIV/0!	#DIV/0!	#DIV/0!	#DIV/0!	#DIV/0!	#DIV/0!	#DIV/0!
									#DIV/0!
									#DIV/0!
		63						#DIV/0!	#DIV/0!	#DIV/0!	#DIV/0!	#DIV/0!	#DIV/0!	#DIV/0!	#DIV/0!
									#DIV/0!
									#DIV/0!
		64						#DIV/0!	#DIV/0!	#DIV/0!	#DIV/0!	#DIV/0!	#DIV/0!	#DIV/0!	#DIV/0!
									#DIV/0!
									#DIV/0!
		65						#DIV/0!	#DIV/0!	#DIV/0!	#DIV/0!	#DIV/0!	#DIV/0!	#DIV/0!	#DIV/0!
									#DIV/0!
									#DIV/0!
		66						#DIV/0!	#DIV/0!	#DIV/0!	#DIV/0!	#DIV/0!	#DIV/0!	#DIV/0!	#DIV/0!
									#DIV/0!
									#DIV/0!
		67						#DIV/0!	#DIV/0!	#DIV/0!	#DIV/0!	#DIV/0!	#DIV/0!	#DIV/0!	#DIV/0!
									#DIV/0!
									#DIV/0!
		68						#DIV/0!	#DIV/0!	#DIV/0!	#DIV/0!	#DIV/0!	#DIV/0!	#DIV/0!	#DIV/0!
									#DIV/0!
									#DIV/0!
		69						#DIV/0!	#DIV/0!	#DIV/0!	#DIV/0!	#DIV/0!	#DIV/0!	#DIV/0!	#DIV/0!
									#DIV/0!
									#DIV/0!
		70						#DIV/0!	#DIV/0!	#DIV/0!	#DIV/0!	#DIV/0!	#DIV/0!	#DIV/0!	#DIV/0!
									#DIV/0!
									#DIV/0!
		71						#DIV/0!	#DIV/0!	#DIV/0!	#DIV/0!	#DIV/0!	#DIV/0!	#DIV/0!	#DIV/0!
									#DIV/0!
									#DIV/0!
		72						#DIV/0!	#DIV/0!	#DIV/0!	#DIV/0!	#DIV/0!	#DIV/0!	#DIV/0!	#DIV/0!
									#DIV/0!
									#DIV/0!
		73						#DIV/0!	#DIV/0!	#DIV/0!	#DIV/0!	#DIV/0!	#DIV/0!	#DIV/0!	#DIV/0!
									#DIV/0!
									#DIV/0!
		74						#DIV/0!	#DIV/0!	#DIV/0!	#DIV/0!	#DIV/0!	#DIV/0!	#DIV/0!	#DIV/0!
									#DIV/0!
									#DIV/0!
		75						#DIV/0!	#DIV/0!	#DIV/0!	#DIV/0!	#DIV/0!	#DIV/0!	#DIV/0!	#DIV/0!
									#DIV/0!
									#DIV/0!
		76						#DIV/0!	#DIV/0!	#DIV/0!	#DIV/0!	#DIV/0!	#DIV/0!	#DIV/0!	#DIV/0!
									#DIV/0!
									#DIV/0!
		77						#DIV/0!	#DIV/0!	#DIV/0!	#DIV/0!	#DIV/0!	#DIV/0!	#DIV/0!	#DIV/0!
									#DIV/0!
									#DIV/0!
		78						#DIV/0!	#DIV/0!	#DIV/0!	#DIV/0!	#DIV/0!	#DIV/0!	#DIV/0!	#DIV/0!
									#DIV/0!
									#DIV/0!
		79						#DIV/0!	#DIV/0!	#DIV/0!	#DIV/0!	#DIV/0!	#DIV/0!	#DIV/0!	#DIV/0!
									#DIV/0!
									#DIV/0!
		80						#DIV/0!	#DIV/0!	#DIV/0!	#DIV/0!	#DIV/0!	#DIV/0!	#DIV/0!	#DIV/0!
									#DIV/0!
									#DIV/0!
		81						#DIV/0!	#DIV/0!	#DIV/0!	#DIV/0!	#DIV/0!	#DIV/0!	#DIV/0!	#DIV/0!
									#DIV/0!
									#DIV/0!
		82						#DIV/0!	#DIV/0!	#DIV/0!	#DIV/0!	#DIV/0!	#DIV/0!	#DIV/0!	#DIV/0!
									#DIV/0!
									#DIV/0!
		83						#DIV/0!	#DIV/0!	#DIV/0!	#DIV/0!	#DIV/0!	#DIV/0!	#DIV/0!	#DIV/0!
									#DIV/0!
									#DIV/0!
		84						#DIV/0!	#DIV/0!	#DIV/0!	#DIV/0!	#DIV/0!	#DIV/0!	#DIV/0!	#DIV/0!
									#DIV/0!
									#DIV/0!
		85						#DIV/0!	#DIV/0!	#DIV/0!	#DIV/0!	#DIV/0!	#DIV/0!	#DIV/0!	#DIV/0!
									#DIV/0!
									#DIV/0!
		86						#DIV/0!	#DIV/0!	#DIV/0!	#DIV/0!	#DIV/0!	#DIV/0!	#DIV/0!	#DIV/0!
									#DIV/0!
									#DIV/0!
		87						#DIV/0!	#DIV/0!	#DIV/0!	#DIV/0!	#DIV/0!	#DIV/0!	#DIV/0!	#DIV/0!
									#DIV/0!
									#DIV/0!
		88						#DIV/0!	#DIV/0!	#DIV/0!	#DIV/0!	#DIV/0!	#DIV/0!	#DIV/0!	#DIV/0!
									#DIV/0!
									#DIV/0!
		89						#DIV/0!	#DIV/0!	#DIV/0!	#DIV/0!	#DIV/0!	#DIV/0!	#DIV/0!	#DIV/0!
									#DIV/0!
									#DIV/0!
		90						#DIV/0!	#DIV/0!	#DIV/0!	#DIV/0!	#DIV/0!	#DIV/0!	#DIV/0!	#DIV/0!
									#DIV/0!
									#DIV/0!
		91						#DIV/0!	#DIV/0!	#DIV/0!	#DIV/0!	#DIV/0!	#DIV/0!	#DIV/0!	#DIV/0!
									#DIV/0!
									#DIV/0!
		92						#DIV/0!	#DIV/0!	#DIV/0!	#DIV/0!	#DIV/0!	#DIV/0!	#DIV/0!	#DIV/0!
									#DIV/0!
									#DIV/0!
		93						#DIV/0!	#DIV/0!	#DIV/0!	#DIV/0!	#DIV/0!	#DIV/0!	#DIV/0!	#DIV/0!
									#DIV/0!
									#DIV/0!
		94						#DIV/0!	#DIV/0!	#DIV/0!	#DIV/0!	#DIV/0!	#DIV/0!	#DIV/0!	#DIV/0!
									#DIV/0!
									#DIV/0!
		95						#DIV/0!	#DIV/0!	#DIV/0!	#DIV/0!	#DIV/0!	#DIV/0!	#DIV/0!	#DIV/0!
									#DIV/0!
									#DIV/0!
		96						#DIV/0!	#DIV/0!	#DIV/0!	#DIV/0!	#DIV/0!	#DIV/0!	#DIV/0!	#DIV/0!
									#DIV/0!
									#DIV/0!

## Sheet: 1 dilution - Summary
		Library concentrations and yields
		Sample name	Concentration of undiluted library (pM)	Concentration of undiluted library (nM)	Concentration of undiluted library (ng/µL)	Library volume (µL)	Available amount of library (ng)
		0	#DIV/0!	#DIV/0!	#DIV/0!	25	#DIV/0!
		0	#DIV/0!	#DIV/0!	#DIV/0!	25	#DIV/0!
		0	#DIV/0!	#DIV/0!	#DIV/0!	25	#DIV/0!
		0	#DIV/0!	#DIV/0!	#DIV/0!	25	#DIV/0!
		0	#DIV/0!	#DIV/0!	#DIV/0!	25	#DIV/0!
		0	#DIV/0!	#DIV/0!	#DIV/0!	25	#DIV/0!
		0	#DIV/0!	#DIV/0!	#DIV/0!	25	#DIV/0!
		0	#DIV/0!	#DIV/0!	#DIV/0!	25	#DIV/0!
		0	#DIV/0!	#DIV/0!	#DIV/0!	25	#DIV/0!
		0	#DIV/0!	#DIV/0!	#DIV/0!	25	#DIV/0!
		0	#DIV/0!	#DIV/0!	#DIV/0!	25	#DIV/0!
		0	#DIV/0!	#DIV/0!	#DIV/0!	25	#DIV/0!
		0	#DIV/0!	#DIV/0!	#DIV/0!	25	#DIV/0!
		0	#DIV/0!	#DIV/0!	#DIV/0!	25	#DIV/0!
		0	#DIV/0!	#DIV/0!	#DIV/0!	25	#DIV/0!
		0	#DIV/0!	#DIV/0!	#DIV/0!	25	#DIV/0!
		0	#DIV/0!	#DIV/0!	#DIV/0!	25	#DIV/0!
		0	#DIV/0!	#DIV/0!	#DIV/0!	25	#DIV/0!
		0	#DIV/0!	#DIV/0!	#DIV/0!	25	#DIV/0!
		0	#DIV/0!	#DIV/0!	#DIV/0!	25	#DIV/0!
		0	#DIV/0!	#DIV/0!	#DIV/0!	25	#DIV/0!
		0	#DIV/0!	#DIV/0!	#DIV/0!	25	#DIV/0!
		0	#DIV/0!	#DIV/0!	#DIV/0!	25	#DIV/0!
		0	#DIV/0!	#DIV/0!	#DIV/0!	25	#DIV/0!
		0	#DIV/0!	#DIV/0!	#DIV/0!	25	#DIV/0!
		0	#DIV/0!	#DIV/0!	#DIV/0!	25	#DIV/0!
		0	#DIV/0!	#DIV/0!	#DIV/0!	25	#DIV/0!
		0	#DIV/0!	#DIV/0!	#DIV/0!	25	#DIV/0!
		0	#DIV/0!	#DIV/0!	#DIV/0!	25	#DIV/0!
		0	#DIV/0!	#DIV/0!	#DIV/0!	25	#DIV/0!
		0	#DIV/0!	#DIV/0!	#DIV/0!	25	#DIV/0!
		0	#DIV/0!	#DIV/0!	#DIV/0!	25	#DIV/0!
		0	#DIV/0!	#DIV/0!	#DIV/0!	25	#DIV/0!
		0	#DIV/0!	#DIV/0!	#DIV/0!	25	#DIV/0!
		0	#DIV/0!	#DIV/0!	#DIV/0!	25	#DIV/0!
		0	#DIV/0!	#DIV/0!	#DIV/0!	25	#DIV/0!
		0	#DIV/0!	#DIV/0!	#DIV/0!	25	#DIV/0!
		0	#DIV/0!	#DIV/0!	#DIV/0!	25	#DIV/0!
		0	#DIV/0!	#DIV/0!	#DIV/0!	25	#DIV/0!
		0	#DIV/0!	#DIV/0!	#DIV/0!	25	#DIV/0!
		0	#DIV/0!	#DIV/0!	#DIV/0!	25	#DIV/0!
		0	#DIV/0!	#DIV/0!	#DIV/0!	25	#DIV/0!
		0	#DIV/0!	#DIV/0!	#DIV/0!	25	#DIV/0!
		0	#DIV/0!	#DIV/0!	#DIV/0!	25	#DIV/0!
		0	#DIV/0!	#DIV/0!	#DIV/0!	25	#DIV/0!
		0	#DIV/0!	#DIV/0!	#DIV/0!	25	#DIV/0!
		0	#DIV/0!	#DIV/0!	#DIV/0!	25	#DIV/0!
		0	#DIV/0!	#DIV/0!	#DIV/0!	25	#DIV/0!
		0	#DIV/0!	#DIV/0!	#DIV/0!	25	#DIV/0!
		0	#DIV/0!	#DIV/0!	#DIV/0!	25	#DIV/0!
		0	#DIV/0!	#DIV/0!	#DIV/0!	25	#DIV/0!
		0	#DIV/0!	#DIV/0!	#DIV/0!	25	#DIV/0!
		0	#DIV/0!	#DIV/0!	#DIV/0!	25	#DIV/0!
		0	#DIV/0!	#DIV/0!	#DIV/0!	25	#DIV/0!
		0	#DIV/0!	#DIV/0!	#DIV/0!	25	#DIV/0!
		0	#DIV/0!	#DIV/0!	#DIV/0!	25	#DIV/0!
		0	#DIV/0!	#DIV/0!	#DIV/0!	25	#DIV/0!
		0	#DIV/0!	#DIV/0!	#DIV/0!	25	#DIV/0!
		0	#DIV/0!	#DIV/0!	#DIV/0!	25	#DIV/0!
		0	#DIV/0!	#DIV/0!	#DIV/0!	25	#DIV/0!
		0	#DIV/0!	#DIV/0!	#DIV/0!	25	#DIV/0!
		0	#DIV/0!	#DIV/0!	#DIV/0!	25	#DIV/0!
		0	#DIV/0!	#DIV/0!	#DIV/0!	25	#DIV/0!
		0	#DIV/0!	#DIV/0!	#DIV/0!	25	#DIV/0!
		0	#DIV/0!	#DIV/0!	#DIV/0!	25	#DIV/0!
		0	#DIV/0!	#DIV/0!	#DIV/0!	25	#DIV/0!
		0	#DIV/0!	#DIV/0!	#DIV/0!	25	#DIV/0!
		0	#DIV/0!	#DIV/0!	#DIV/0!	25	#DIV/0!
		0	#DIV/0!	#DIV/0!	#DIV/0!	25	#DIV/0!
		0	#DIV/0!	#DIV/0!	#DIV/0!	25	#DIV/0!
		0	#DIV/0!	#DIV/0!	#DIV/0!	25	#DIV/0!
		0	#DIV/0!	#DIV/0!	#DIV/0!	25	#DIV/0!
		0	#DIV/0!	#DIV/0!	#DIV/0!	25	#DIV/0!
		0	#DIV/0!	#DIV/0!	#DIV/0!	25	#DIV/0!
		0	#DIV/0!	#DIV/0!	#DIV/0!	25	#DIV/0!
		0	#DIV/0!	#DIV/0!	#DIV/0!	25	#DIV/0!
		0	#DIV/0!	#DIV/0!	#DIV/0!	25	#DIV/0!
		0	#DIV/0!	#DIV/0!	#DIV/0!	25	#DIV/0!
		0	#DIV/0!	#DIV/0!	#DIV/0!	25	#DIV/0!
		0	#DIV/0!	#DIV/0!	#DIV/0!	25	#DIV/0!
		0	#DIV/0!	#DIV/0!	#DIV/0!	25	#DIV/0!
		0	#DIV/0!	#DIV/0!	#DIV/0!	25	#DIV/0!
		0	#DIV/0!	#DIV/0!	#DIV/0!	25	#DIV/0!
		0	#DIV/0!	#DIV/0!	#DIV/0!	25	#DIV/0!
		0	#DIV/0!	#DIV/0!	#DIV/0!	25	#DIV/0!
		0	#DIV/0!	#DIV/0!	#DIV/0!	25	#DIV/0!
		0	#DIV/0!	#DIV/0!	#DIV/0!	25	#DIV/0!
		0	#DIV/0!	#DIV/0!	#DIV/0!	25	#DIV/0!
		0	#DIV/0!	#DIV/0!	#DIV/0!	25	#DIV/0!
		0	#DIV/0!	#DIV/0!	#DIV/0!	25	#DIV/0!
		0	#DIV/0!	#DIV/0!	#DIV/0!	25	#DIV/0!
		0	#DIV/0!	#DIV/0!	#DIV/0!	25	#DIV/0!
		0	#DIV/0!	#DIV/0!	#DIV/0!	25	#DIV/0!
		0	#DIV/0!	#DIV/0!	#DIV/0!	25	#DIV/0!
		0	#DIV/0!	#DIV/0!	#DIV/0!	25	#DIV/0!
		0	#DIV/0!	#DIV/0!	#DIV/0!	25	#DIV/0!
